# Supplementary material for: The Making of the New European Wind Atlas, Part 1: Model Sensitivity
Source: Copernicus journal article supplement (doi:10.5194/gmd-2019-349), 2020-03-20
Supplement: Supplementary file [file gmd-2019-349-AC1-supplement.pdf]

# Response to Referee #1

Thank you for the comprehensive comments, and also for taking the time to truly read through our manuscript. We feel that your comments were very helpful for increasing the quality of the paper to its current level. Your comments, together with those of referee #2, led to a thorough revision of the paper.

The most general comments regarding the revisions to the manuscript are:

1. At the start of the research project typically there are high expectations placed on the sensitivity experiments, however, reality always brings some corrections and caveats. Given the enormous possibilities in setting up WRF, an “optimal” configuration is unreachable. We have tried to revise the introduction to convey that the paper focuses on finding the “best possible” model configuration **constrained** by the practical issues in running the model simulations and the ultimate goal to use the simulations for a **wind atlas**.
2. The manuscript aims to tell the story of how the NEWA wind atlas came to be. Therefore, further analysis of the model results will make the flow of the paper less clear. We have tried to enhance this structure in the revised manuscript.
3. We have replaced some of the figures (6, 9–12, 13) to homogenise the analysis of the results. We have also added new figures including the RMSE and circular EMD for wind direction.
4. We strengthened the connection to the companion paper, <https://www.geosci-model-dev-discuss.net/gmd-2020-23/>, which is now available.

The reviewers’ comments are in black and [our responses in blue](#).

## General comments

1. First and foremost, the dataset could (should?) be made publicly available. The data availability section only refers to the final NEWA product, not to the sensitivity experiments upon which the presented results have been based. This is not just a reproducibility issue. Many interesting research and model development questions beyond the scope of NEWA can be addressed with this rich sensitivity dataset, and it would be a waste not to share it.

[We agree. However, the subset of the WRF model data from the simulations totals 15 TB. We are trying to find a solution, perhaps via an EUDAT grant. As a minimum we will make available the yearly wind statistics from each simulation in Zenodo.](#)

2. Furthermore, the discussion is very limited in scope. There is no comparison with similar efforts (although smaller in scope), based on different models. The discussion stays away from any physical interpretation and lacks critical reflection

on important choices that have been made. The impact beyond the NEWA project is not considered at all. For example, the authors state that “it would have been optimal to evaluate the results of the ensemble simulations with the large dataset used in the companion paper”. But this can still be done, and although the insights would not propagate to NEWA, they could clarify some of the questions that currently remain unanswered. The last of the specific comments lists further issues that I would like to see in the discussion.

We agree with the statements above, however we feel that the narrow nature of the manuscript is justified taking into account that there exists a second part to this study in a companion manuscript that is dedicated to critically evaluating the results of the final choice. Also, as mentioned above, the manuscript tries to tell a coherent story of the choices made during the creation of NEWA wind atlas. Including further data analysis at this stage might just increase the confusion. Also, we believe the manuscript is already long enough. We believe the scope of the manuscript is still useful to modellers both in wind energy and in wider applications of numerical weather prediction models.

Even if we wished to do further evaluation with the data used in part 2, it would not be possible. Figure 4 in part 2 shows the tall masts available in the Vestas database. The comparison will be limited since there are no masts in Denmark and very few in Germany. In Poland data exists in some masts but for only a few months in 2015.

3. Some minor aspects of the model configurations are not documented, which hampers reproducibility. For example the determination of vertical levels or the parameters of the lambert projection. Perhaps the authors could share the namelist of the final configuration? It is also not clear whether the WaSP downscaling methods has been applied to the presented results (and if so, it should be documented).

All namelists are shared in the project GitHub (<https://github.com/newa-wind>) and in the NEWA Zenodo (<http://doi.org/10.5281/zenodo.3709088> site, this also includes all the “geo” files used in the model simulations. The link to zenodo is located under “assets” in the manuscript GMD website. Therefore, the simulations are reproducible. The full description of the NEWA model grid is in the companion manuscript [1].

As for the second question. No further downscaling is done in this Part 1. All the evaluations against tall masts are done with the raw WRF model data. The sites are relatively simple (offshore and over flat terrain), where the microscale modelling will add little to the mesoscale model solution.

## Specific issues

1. P2 L14: While it is very clear in the abstract, I miss a sentence like: "This paper describes our efforts to find an optimal configuration of the WRF mesoscale weather model for the production of a New European Wind Atlas (NEWA)." in the introduction. The configuration of WRF for the production of NEWA is the main focus of the paper, yet its introduction is a bit out of the blue with a reference to Petersen 2017. It would be good to provide more context about NEWA. Why was WRF chosen, for example? Given that virtually all options within WRF are investigated in this study, presenting the choice for WRF itself as a an accomplished fact feels a bit unsatisfactory. Line 14 in particular starts with "Given the EWA is 30 years old", which begs for something like "A and B bundled forces to produce an updated wind atlas."

Agreed. We have added a new paragraph about the wider NEWA project in the introduction. The rationale for using the WRF model is also included.

2. P2 L10: perhaps explain "the so-called wind atlas method" in one or two sentences? Is this the same method referred to in P2 L22? And is this method also used for the evaluations presented here? P23 L31 makes me think it is indeed, yet P24 L17 seems to suggest the opposite (but it is a bit unclear what is meant by "the full downscaling model chain"). If no further downscaling is used for this study, perhaps don't mention it at all.

The wind atlas method is mentioned in the introduction because it was used to create the earlier European Wind Atlas. But we understand that can be confusing and reference to it was removed from the rest of the paper.

3. P3 L 12-29: this paragraphs seems a bit out of place. I suggest moving it to somewhere around P3 L4-6, such that P3 L30 logically follows after the part about "The approach in NEWA". Perhaps the statement about "best practice setup" can then also be combined with the reference setup referred to in P3 L34.

Excellent suggestion, thanks. The three paragraphs starting in P2, L25 and ending in P3, L29 have now been restructured in a more logical way: (1) adapting models to wind energy applications, (2) review of previous ensemble studies, and (3) approach taken in this paper.

4. P4 L20: This requires further discussion, as land surface/soil moisture "memory" is known to significantly affect the results.

We did consider the issue of land surface and soil moisture memory. In regional climate model simulations, the NWP model parameterisation are often tuned to avoid model drift (e.g. [3]). For generating a wind atlas, we are not worried about model drift because the simulations are re-initialised often (here - every 7 days). It would be optimal if we could re-initialise the atmospheric model often, but keep the state of the land surface from one simulation to the next. However,

for practical reasons this is not possible, since the simulations had to be run sequentially. Also, it is not obvious that the precipitation produced by the WRF model is accurate enough to keep the soil moisture from drifting. Lastly, the land surface and soil moisture memory is indeed important in simulating climate-relevant parameters such as temperature and precipitation, but we don't think there is enough evidence that it is critical in wind reanalysis. The connection between soil moisture, sensible heat flux, wind profile and wind speed does exist, but we do not have a systematic way of validating it in the context of NEWA. We have tried simulations initialised with Global Land Data Assimilation System (GLDAS) data, but the results were inconclusive.

5. P5 Fig1: All masts seem to be located in the northernmost domains (compare with Fig3). If the configuration was optimized for Northern Europe, what does this mean for the validity of NEWA for the South-European domains?

Yes, unfortunately there are very few quality tall (above 50 m height) masts in Europe publicly available. At the start of the project, we had eight sites in Northern Europe and another hand-full in the other domains. It is not optimal, but we had no other option. Winds observations from surface stations are plentiful, but often they are placed in complex sites that make the evaluation difficult, and the accuracy of a model at 10-m height does not give any warranty that the WRF configuration will also be accurate at wind turbine height [2]. In this manuscript we argue that the combinations of PBL/SL parameterisation schemes behave the same way in different regions in Europe (section 5.1) and thus conclusions from Northern Europe are also applicable to the other regions. We believe that this statement and approach is supported by the evaluation results of the wind atlas that are described in companion manuscript (Part 2)

6. P6 L8: "Due to difficulty . . . has not been filtered or corrected". This requires more justification. At least the authors could say something about how the performance differs between the various masts or between wind direction sectors. That should provide some intuition about the potential effect of wind farm distortions. It might also be relevant to mention the wind directions that were filtered for FINO, Riso and Hovsore explicitly. Are these prevailing wind directions or not? And how do they relate to the nearby coastlines? Especially in coastal areas, I think it is not safe to assume that model performance is uniform across all wind directions.

The wind sector filtered for mast distortion is now explicitly listed in Table 1. We have also corrected the height of FINO1 and FINO2 and added the height of the wind direction data used in the analysis.

7. P6 L15: While I believe the presented evaluation metrics achieve the stated objective of selecting a single best model configuration for the production of the NEWA (in terms of wind speed), their presentation is quite unclear. I would advise to

use the more common term "mean absolute error" (MAE) instead of "absolute bias". Also I would advise against making all metrics "relative", which is mostly confusing. Comparison against a baseline (or: reference) is very good. However, isn't the more common approach to use their fraction rather than the difference? See for example literature on fractional skill score, or the excellent textbook by Wilks (statistical methods in the atmospheric sciences). You would get  $SS = 1 - (MAE / MAE_{ref})$ , and  $SS = 1 - (EMD / EMD_{ref})$ , which would approach 1 for a perfect forecast and 0 for no improvement over the baseline. I suppose that such a uniform scoring system would help to judge whether an improvement in one metric is worthwhile if it is accompanied by deteriorating scores for other metrics or locations. Right now, that's not clear (see e.g. my specific comment P18 L5).

That is a very good suggestion, thanks. We have now revised Figures 9–12 to use this "skill score (SS)" as  $SS = 1 - (MM/MM_{ref})$ , where  $MM$  is BIAS, RMSE, EMD or CEMD.

8. P6 L19: "The main goal of the NEWA project was the evaluation of the wind climate, which is usually understood as the probability distribution of wind speed and direction at a specific point". Why then, is wind direction not evaluated at all in this manuscript? And what about vertical wind shear?

That is a very good point. We have now included the evaluation of the wind direction for the initial simulations and the large ensemble. However, as mentioned above, the manuscript tells a story of how we arrived to the final NEWA configuration. Adding new parameters such as wind shear, while interesting and relevant, deviate from the main story of the document.

9. P6 L24: This statement is quite irrelevant and I doubt if it's always true. I suggest to remove it.

Agreed. The two sentences have been removed.

10. P6 L29: Move part about RMSE to after the stuff about bias. Also, perhaps refer to a paper about skill-scores. Part about comparing to baseline/reference setup is a good idea and might be useful for others that want to learn from this study. Therefore, a very clear explanation is appropriate. I had to read it three times.

Agreed. The section has been rewritten to objectively describe of the methods used. We also added the new metric for the wind direction, the circular EMD, or CEMD.

11. P7 Fig2: I understand that the histogram representation of the wind speed distribution is appealing because it is widely known. Panel A succeeds in showing the difference between EMD and absolute bias, but I wonder if this cumulative distribution plot would be even more intuitive. Also, I'm curious why the difference between EMD and absolute bias is larger for small absolute bias.

An additional panel showing the EMD as the area between the cumulative distributions has been added to Figure 2.

The question “why the difference between EMD and absolute bias is larger for small absolute bias” could be reformulated as “why is the difference between EMD and absolute bias smaller for larger absolute bias”. If two distributions have the same mean, then the bias is not able to distinguish between them but the EMD can be used to measure how similar are the distributions. If two distributions have the same shape but different means, then the minimal transport necessary to “move” the distributions towards each other will be equivalent to the difference in means. A nice illustrative example of EMD properties can be found in: Lupu et al.[5]. We have added this reference to the article’s text.

12. P7 L15: The EMD explained as the are between CDFs is very intuitive. It took some effort to verify this, but eventually I found it (<https://stats.stackexchange.com/a/299391>). It seems that this statement is only true for univariate distributions. A reference here would be appropriate.

Agreed. The reference Rabin et al. [6] extends the CDF interpretation of EMD to circular variables. The text has been updated to clarify this and the fact that this applies only to one-dimensional distributions.

13. P8 L16: I understand that the authors try to put emphasis on the differences (or rather: the absence thereof) between the geographical domains, especially seeing that PBL is further investigated later on. It is indeed a good idea to test this domain-sensitivity with various set-ups. But the section is written such, that the reader tends to focus mostly on the performance between PBL schemes rather than geographical domain. This is especially true towards the end of the section, where it seems that conclusions are drawn about the reference configuration, rather than about the domains. Both figures 5 and 6 contribute to this shift of focus.

Agreed. The main focus of the section was to show similar sensitivity in various regions and not on the evaluation. We suggest a new structure where section 5.1 relates to the five domains only, and a new section is added where we discuss the validation against the sites in only one of these domains.

14. P8 L19: I think it would be good to briefly explain the differences between these two PBL schemes, and why these two schemes were chosen. PS: or in the later section.

Good point. A sentence has been added to the revised manuscript.

15. P9 Fig3: The experimental sites don’t seem to correspond to the locations of the masts used for the evaluation presented in this paper. What then, is the reason to show these sites? Perhaps this figure could be merged with Figure 2? Also, the abbreviation ”PD” is not clear to me.

We removed the NEWA experimental sites from the figure. They are not relevant to this paper because data from the experiments were not used in the model validation. “PD” stands for Perdigão, the NEWA experimental site in Portugal. We renamed it “PO”, Portugal, to avoid confusion.

16. P9 Tab2: It would help the reader if the acronyms (particularly the meaning of S1 and W1) was explained in the text/caption.

Agreed. A short explanation has been added.

17. P8 L26: “the largest differences arise from the choice of PBL scheme, as shown in Fig 4”. While the figure clearly illustrates the point that the authors make about the coincidence of regions with high surface roughness with areas of large differences between PBL schemes, it does not actually show, as the authors claim, that this is the largest difference. But even if it’s not the largest difference, it would still be interesting to also show/quantify the effect of the different initialization strategy. Moreover, in the light of the authors’ excellent point about the necessity to quantify differences between distributions, I’m quite surprised that they opted here to show the difference in the mean annual wind speed, rather than the more comprehensive EMD.

Agreed. The figure does not show that the largest differences arise from the choice of PBL scheme. But, the following figures do. Except for the northwest of the NW domain and mountainous areas in the Pyrenees and the western Alps, the differences are larger in the MYNN-YSU than the W1-S1 comparison. We have toned down the statement in the manuscript.

Instead of including more maps, which were not used in the original work, Figure 6 in the manuscript now shows the various statistics for the sites, including EMD. At the time this analysis was done we had not yet discovered the advantages of using the EMD.

18. P11 L4: I’m a bit concerned about the authors’ conclusion that the weakly nudged setup is actually the best choice. Particularly, I would like to see whether the evaluation statistics are dependent on the lead time of the simulation.

The plots depicting error metrics as a function of lead time are depicted in Figure 2. The lead times were aggregated into 12-hour bins, and the weighted average over all the stations is shown, with weights being the number of samples available for each bin in each station. The metrics shown are BIAS, the absolute value of BIAS, with the absolute value being taken before the averaging process, RMSE and EMD. No specific pattern can be observed that would describe how the error metrics evolve over time — probably the number of samples is too small and random errors dominate the distribution. On average, the error metrics for weekly runs are smaller than for the daily runs, which confirms the results described in the paper. The EMD for weekly runs is about the same as for the daily runs for MYNN PBL scheme, but YSU weekly runs seem to be associated with slight



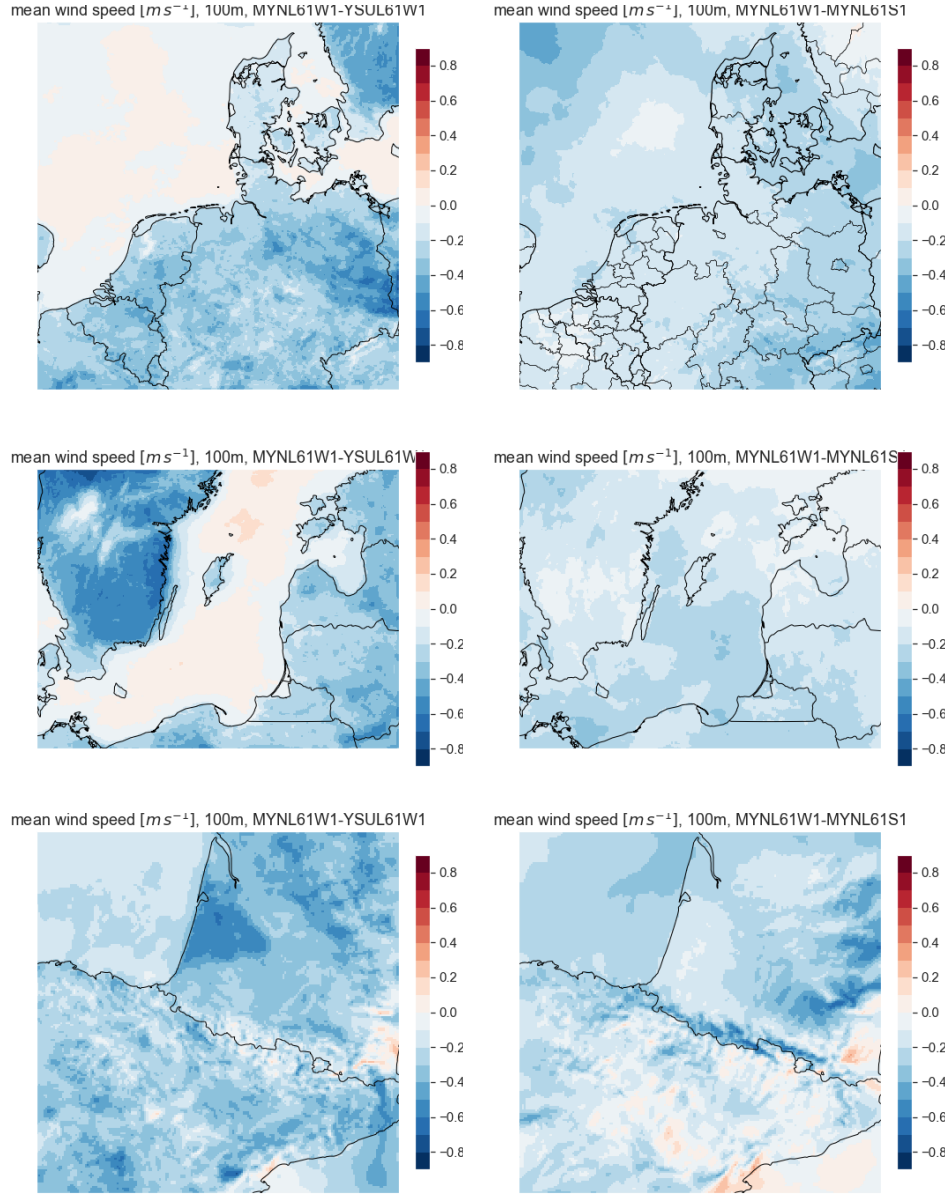

Figure 1: Differences in annual mean wind speed at 100 m between pairs of model simulations: MYNN-YSU on the left, W1-S1 on the right for three of the model domains. The colour bar is identical for all panels.

increase in EMD. However, one must take into account the difference in number of samples in each distribution, and it is likely, that EMD penalises the inhomogeneity that arises from the smaller number of samples. The figure shows a slight downward trend for both the BIAS and absolute value of BIAS, consistent with the hypothesis that the increased performance of weekly runs comes from the fact that the model solution is allowed to fully develop the mesoscale circulations,



however, more detailed investigation of this matter is beyond the scope of this paper. The effect of the spin-up time was previously studied in Hahmann et al (2015) [4] and Vincent and Hahmann (2015) [7].

In conclusion, based on the statistics presented in this paper and previous studies, we believe the choice of the weekly simulations is justified. From the answer to Referee #1 (item number 12 in P8,L16) section 5.1 is now split into two sections. In the second of these, we will add a couple of sentences justifying the use of the weekly setup.

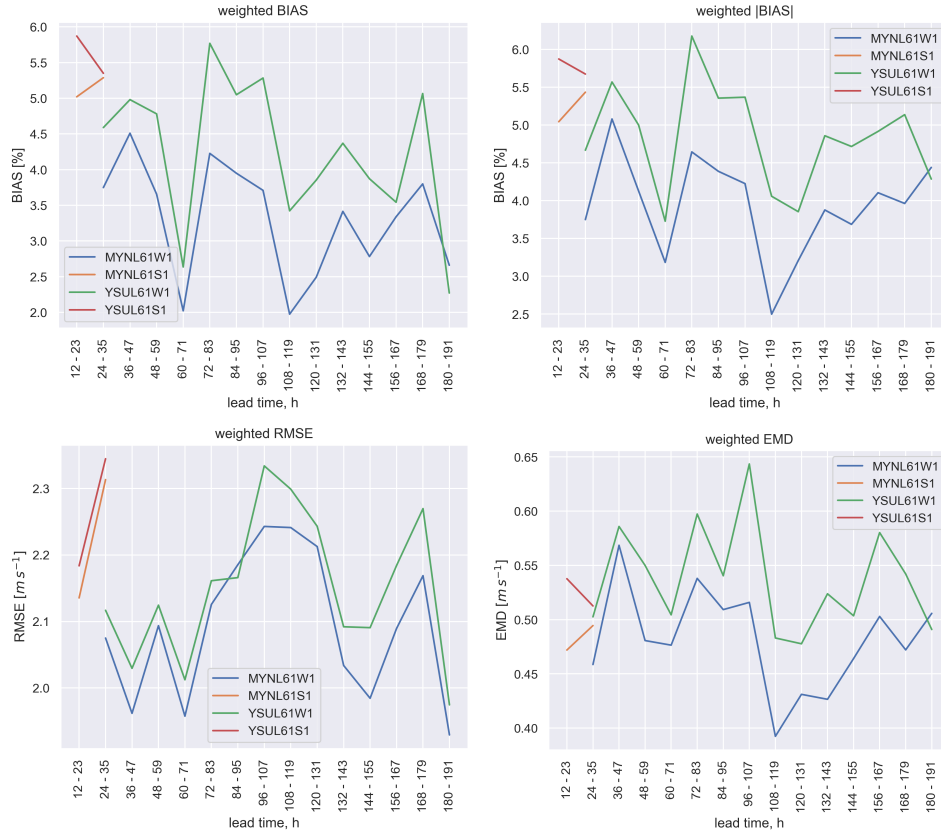

Figure 2: Error metrics as a function of lead time. Lead time is aggregated in 12-hour bins. Weighted average over all stations used in the analysis is shown with weights being the number of samples. Please note that the number of samples in each lead time bin for YSUL61S1 and MYNL61S1 runs is much larger than for YSUL61W1 and MYNL61W1, i.e.  $\sim 4000$  samples for S1 run bins and  $\sim 600$  samples for W1 bins.

19. P11 L9: Change title? Most of the section is about the modifications to MYNN.

The title of the section heading has now been changed to “Sensitivity to properties of the MYNN scheme”

20. P12 Fig6: Is this figure for all mast heights? And are the differences shown here

actually significant? Especially the correlation seems very consistent between all runs. And what about the earth mover's distance? Why is it not shown here? Is the bar plot really the best choice here, seeing that differences are amplified or dampened depending on the choice of the axes' intersection?

No, the figure shows the metrics for the underlined heights in Table 1. We chose to validate for the height that is closest to the common turbine height  $\sim 100$  m. This info has now been added to the figure caption.

This figure has been replaced by a new figure that now includes the EMD and CEMD in addition to the BIAS and RMSE. This homogenises the results with the rest of the paper. However, at the time this analysis was done we had not yet discovered the advantages of using the EMD and the choice of model configuration was not based on this measure.

21. P13 L5: It would be useful to describe how these 25 configurations were selected from on the thousands of combinations alluded to before. Perhaps repeat or elaborate on the “expert judgement” here.

For PBL/SL/LSM parameterisation the number of options is more finite because some combinations are technically not possible. At the beginning of our study, the table of experiments contained many more combinations. As mentioned in the following paragraph, many of the combinations simply did not run despite our attempts to do so and were excluded from the final set of experiments.

22. P16 L16: “absolute difference in relative bias”. This formulation is incorrect. A correct formulation would be “Fig 9b shows the difference in absolute relative bias between ...”.

Agreed. Please see answer to item 7.

23. P17 Fig9: I would suggest to group figures 9 and 10 together, OR, to present 9a and 10a together, and 9b and 10b. As it is now, it is difficult to compare figures 9b and 10b. Also, consider using a different colormap for a and b, since right now green means “good” in b, but not in a, in both figures.

Thank you. This is a good suggestion. We have also homogenised all the figures that rely on “heatmaps”. Now any purple values are “good” and any brown values are “bad”. The new colour table is colour blind friendly.

24. P18 Fig10: It is not clear to me how the “relative” EMD is calculated in panel A. And is the same “relative” EMD used for panel B? Why not just show the EMD in m/s? I feel the author's are making things needlessly complicated. Same question applies to the “absolute bias”. Although I can see that the “non-relative” metrics are wind-speed dependent, mean wind speeds are all around 10 m/s, so the differences between sites will be very small. Therefore I would argue: simpler is better.

In total agreement. Please see response above (item 23).

25. P18 L5: I’m not sure if the choice for MO is justified based on the statistics shown. Although the EMD improves slightly for four sites, it degrades severely for some of the others. I’m not sure of the overall effect is positive. This could use some extra discussion.

Agreed. This topic deserves a longer explanation

We can start explaining what we mean by the best model setup. The best model setup would have the best verification metrics for all the stations analysed. The problem is that from the sensitivity analysis results it is clear that some model setups have better scores for one verification metric (e.g. EMD) and some setups have better scores in other metrics (e.g. RMSE). Also, the performance of the setup varies considerably from station to station. In addition, one can clearly see that performance at each station is systematic. There are “good” stations where all setups perform well (e.g. FINO1) and “bad” stations where all setups struggle (e.g. Risø). Should the model setup performance count more in the good stations? Or in the bad stations? The model bad performance is often associated with details of the station siting, which are poorly represented in the WRF model resolution used.

In addition, our goal is to choose the model setup that would perform best over the full NEWA domain. Basing this choice on 8 stations introduces significant uncertainty. Taking into account all the results available to us (not all of them included in the manuscript due to the issues of space) and the limitations described above the conclusion is, that there is no single setup that could be easily identified as “the best”. Instead, we have a small set of setups, where each performs equally good (or bad) depending on the metric or station. An argument could be made that each of them should be used for the final product. While working on the project, we made the conscious decision not to delegate the decision to a simple algebra of taking the average metrics over all the stations, because that would introduce the assumption that this decision would not change, if for example another station is added.

We would argue that we cannot distinguish the performance of these “good” members based on the observational data available. In addition, due to the limited computational resources available we had to look at the computation aspects of the setups. The MO setup is one of the best performing, according to the verification results. It performs well both in terms of distribution (EMD) and in time-series (RMSE). It has the additional benefit of runs being numerically stable, when compared to BASE, i.e., the runs failed less (this aspect was important, because of the necessity for a person to monitor and re-submit the runs), and MO also had a favourably small computational time when compared to other setups.

We are aware that arguments could be made that some other setup should have been chosen. We would have liked to be able to make this decision using more observations or after some additional analysis, however, due to the practical con-

strains, a decision had to be made based on what can only be described as “imperfect information”, a situation that might be familiar to many readers of this manuscript. Therefore, we would like to argue that the our choice is validated by the good evaluation results described in Part 2. We would like argue that although we are not claiming that we made the ”perfect” choice, that is, it is possible that choosing some other setup would have yielded even better metrics, but our choice was ”good enough” given the information we had available at the time.

In conclusion. We plan to include some of the points raised above in the revised manuscript especially in the “discussion and outlook” section.

26. P19 L8: This is interesting indeed. Perhaps the authors can discuss this observation a bit more in depth? I’m still not convinced that 8-day nudged simulations are the best choice.

Agreed. We have expanded the figures to include the RMSE and CEMD. To follow this the discussion, we have expanded the discussion regarding the differences between statistics that look at the distribution versus time synchronisation.

The new figures added show better agreement not only for the overall distribution (EMD), but also in the RMSE. The stronger nudging towards the re-analysis, which has observational data assimilated in it, in experiments NUDD3 and GNUD3 results in smaller RMSE. The interesting question is: why does it degrade the BIAS and EMD performance? A simple answer is that the WRF model mostly has increased performance over ERA5 (see Part 2 [1]) and therefore nudging towards the poorer performing model decreases model performance. A comprehensive answer to this question is beyond the scope of this paper, however, the conclusion is less surprising than it seems, taking into account the many different interactions between wind speed, surface energy budget, transport in the surface/planetary boundary layer, etc. Nudging is “artificial” or non-physical and can interfere with these complicated processes in non-trivial way.

27. P20 Fig11: Same comments as for fig 9 and 10: it would be better to use a different colormap for figures a and b, and perhaps group all figures together to prevent them spreading over multiple pages. Also reconsider using relative/normalized metrics.

Indeed. The colour tables used in the figures have been homogenised and we now use the SS statistic to compare to the base simulation. Please see our answer to 23.

28. P20 L6: “at hub height”. Does this mean that only  $\sim 100$  m was used for all tables? So far I wasn’t sure, but I was under the impression that the metrics were calculated on the basis of all measurement heights. What does this mean for the representation of the (distribution of) wind shear between the various model

simulations? I know that the mean profiles have very similar shear, but beware that instantaneous profiles can show substantial variation!

All the statistics have been computed for the levels underlined in Table 1. As the reviewer suggests, the behaviour of the wind statistics could be very different at e.g. 10 meters. We focus on heights relevant for wind energy development. We have added the height of the validation to all figure captions.

For lack of space we concentrate on a single level and do not consider the shear distributions. These have been analysed in a previous paper [4].

29. P20 L7: “Unfortunately, we did not run... so we cannot”. This statement contributes substantially to the overall impression that this manuscript is an accomplished fact.

The sentence has been rewritten. However, it is a fact that the project is complete, and while some further simulations would have been very interesting to do, they were not able to be accomplished during the period of this study.

30. P21 L3: It seems a bit weird that this is the last experiment. If I would have designed this experiment, it would have been the first, as the other settings may depend on it. Especially the combination of domain size and nudging/initialization strategy seems influential.

Yes, agreed. This was not the last experiment to be done. It was done at a similar time than the NW domain sensitivities. However, it seemed to fit better here for the flow of the manuscript. In addition, the production run did not follow the advice of using smaller domains. We just hope that the results described here are useful to someone else in the future.

31. P21 L8: This is an interesting dilemma. Did the authors modify the WRF registry to output only the relevant parameters? Would the “restart” option not lift this constraint as the simulation time could be shortened to enable intermediate postprocessing? And how does the pan-European domain compare to the CONUS domain used in the rapid refresh configuration of NOAA? Have the authors contacted them for advice about their reference setup and HPC strategy? Options to stream the WRF output, or to access model fields during a simulation to postprocess them right away would be very welcome recommendations for model development. I wonder whether such features are already available, for example through the “basic model interface” developed by CSDMS.

The creation of the simulations and the postprocessing of the output for a wind atlas is quite different from that of NWP output. For example, the histograms of combined wind speed and wind direction distribution are needed for each model grid point and height for the complete duration of the model simulation. There are more details on the post-processing in the companion paper [1].

32. P21 L11: “outside region of interest . . . would be wasted”. I have to disagree here. Although it is not the explicit goal of the NEWA project, these data could be very useful for those non-EU countries. Again, please broaden the scope from ”NEWA” to ”a relevant and interesting dataset for the audience of GMD”. I think this dataset can have more impact if it would be available for other researchers as well. The term ”waste” therefore rubs me the wrong way.

Agreed. The sentence was a bit harsh and has been rewritten. For context, the computational and time resources were limited — the simulations took 6 months to compute, and every available CPU hour allocated in the PRACE grant for using the cluster at the Barcelona Supercomputer centre (BSC) was used. Also, the data storage is nearly 160 TB, which took almost as long to transfer from the BSC as it did to compute. The scarcity of resources meant that the resources available had to be used frugally. Therefore, while we would have liked to extend the spatial coverage and scientific questions we could answer, hard decisions had to be made to prioritise what could be feasibly handled given the resources available.

33. P21 L26: (and possibly . . . not shown). Model runs that would show this have also not been described as far as I can see. What additional simulations did the authors perform that inspire this statement, or is it mere speculation?

A simulation with a large outer domain and a small inner domain was carried out. The mean wind speed from this extra simulation resembles that of the LG simulation more than the SM simulation. From this, we infer that the position of the inflow boundary is important, but more research is needed. To keep the discussion brief this simulation was not added to the original manuscript. We have rewritten the sentence in the updated manuscript removing the mention of additional simulations that have not been explained.

34. P21 L34: “We decided, however, against very small domains. In terms of accuracy they would probably perform better”. Not only does this statement sound speculative, it also partly undermines the objective of the paper. If one of the options considered (the SM domains) was not an option to begin with, why test it? For some sites, the impact of this decision seems to be larger than the accuracy gained through the detailed optimization of all other settings of the model. . .

Yes, agreed. It is contradictory, but we hope that this would be useful information to future wind modellers. Please see our answer to question 30.

35. P22 Fig13: The y-axis is unreadable.

Apologies. The figure has now been replaced with the heatmaps tables to match previous discussion.

36. P24 L2-3: “In that paper we conclude that...” ? Better than just using “raw” ERA5 data?

Agreed. The sentence is too strong and perhaps not relevant here. It has been rewritten.

37. P24 L4: “some questions remain unresolved ... expensive nature of the numerical experiments”. This is obviously true, but I feel there are many more questions unanswered because of limited manpower. I’d really appreciate it if the authors could reflect more on that aspect of their study.

Agreed. Many questions always remain unanswered. And because of the limited set of observations this was not the best region to carry out the many test needed. However, this study still has done much more than previous wind atlas studies. The project has ended and there is limited funding to continue the analysis of the results.

Some issues regarding the diurnal cycle in the observations and the model simulations are currently being studied. We hope a new publication will result from that analysis.

38. P24 L17: “It would have been optimal...” again this contributes to the “accomplished fact” feeling. This can still be done, can’t it? And it can answer some of the questions I have asked, e.g. P5 Fig1 related to the representativeness of the northern domains for Southern Europe.

Unfortunately this is not possible, due to the limited availability of relevant datasets for validation. However, Part 2 [1] of the study shows very good comparison of the WRF simulations using the final configuration against the Vestas tall tower data. However, because the data is proprietary, the geographical distribution of the errors cannot be shown. Figure 10 of that study shows larger errors in, for example, Turkey compared to the northern sites, but the larger number of sites in France does not show the same tendencies. In addition, we have added to the revised manuscript that “This large dataset can be further verified as additional data becomes available”. Hopefully this helps alleviate the “accomplished fact”.

In the revised manuscript we will strengthen the connection between the two parts of the study. This should help clarify many aspects of part 1.

39. P24: The discussion (or other parts of the paper if appropriate) should also address why vertical resolution was not subject to sensitivity analysis, what the uncertainty of the observations is, why wind direction is not considered at all, whether performance is similar across different heights, why/how wind shear has (not) been assessed, how the set-up compares to other similar efforts. The outlook should offer some advice for future studies: what have we learned from this study, in what direction should model development evolve, what are the main strengths/weaknesses of the WRF setup, which parameterisation schemes should we abandon right away, etc.



Agreed. Further discussion has been added. In early experiments, not reported in the manuscript, we experimented with increasing the number of vertical levels from 61 to 91. The results of that experiment showed very small differences between the simulations.

## References

- [1] Martin Dörenkämper et al. “The Production of the New European Wind Atlas, Part 2: Production and Validation”. In: *Geosci. Model Dev. Discuss.* in review (2020).
- [2] Caroline Draxl et al. “Evaluating winds and vertical wind shear from WRF model forecasts using seven PBL schemes”. In: *Wind Energy* 17 (2014), pp. 39–55. DOI: 10.1002/we.1555.
- [3] Filippo Giorgi. “Thirty Years of Regional Climate Modeling: Where Are We and Where Are We Going next?”. In: *J. Geophys. Res. Atmos.* (June 2019), 2018JD030094. ISSN: 2169-897X. DOI: 10.1029/2018JD030094. URL: <https://onlinelibrary.wiley.com/doi/abs/10.1029/2018JD030094>.
- [4] Andrea N Hahmann et al. “Wind climate estimation using WRF model output: Method and model sensitivities over the sea”. In: *international Journal of Climatology* 35 (2015), pp. 3422–3439. DOI: 10.1002/joc.4217.
- [5] Noam Lupu, Lucía Selios, Zach Warner, et al. “A new measure of congruence: The Earth Mover’s Distance”. In: *Political Analysis* 25.1 (2017), pp. 95–113.
- [6] Julien Rabin, Julie Delon, and Yann Gousseau. “Circular Earth Mover’s Distance for the comparison of local features”. In: *2008 19th Int. Conf. Pattern Recognit.* IEEE, Dec. 2008, pp. 1–4. ISBN: 978-1-4244-2174-9. DOI: 10.1109/ICPR.2008.4761372. URL: <http://10.0.4.85/icpr.2008.4761372%20https://dx.doi.org/10.1109/ICPR.2008.4761372%20http://ieeexplore.ieee.org/document/4761372/>.
- [7] Claire L. Vincent and A. N. Hahmann. “The Impact of Grid and Spectral Nudging on the Variance of the Near-Surface Wind Speed”. In: *Journal of Applied Meteorology and Climatology* 54 (2015), pp. 1021–1038. DOI: 10.1175/JAMC-D-14-0047.1.

## Editorial remarks

1. Excessive use of commas and conjunctions make parts of the text difficult to read. this can easily be addressed by making shorter sentences. For example:

Yes, we agree. We have revised the manuscript and shortened sentences whenever possible. The specific sentences have been corrected as listed below.

- P2 L6-7: rewrite ”but not only”. Very wordy sentence, it has been rewritten.

- P2 L7-8: use only on of "for example ... to name a few". [Fixed](#).
- P2 L13-15: suggest " ... its usefulness. It has ...". [Done](#).
- P3 L13-16: start new sentence at "however". [Done](#).
- P3 L10: start new sentence at "however". [Done](#).
- P3 L12: "A large number" or "Large numbers of" . [Done](#). [We have also removed unnecessary words from the sentence.](#)
- P3 L16-18: move "has been reported" to beginning: "a number of studies report ...". [Done](#).
- P3 L19: remove comma after "cases", suggest: "two processes with opposing effects" (remove "canceling each other out") [Done](#).
- P3 L21: citation without brackets. [Fixed](#)
- P3 L28: coastal winds? Flow is ambiguous (air or water). [We clarified that we refer to the atmospheric flow in the coastal zone.](#)
- P4 L8: Simulations (plural), or perhaps "reference configuration"? [Yes, it should be simulations.](#)
- P6 L23: remove "in". [Removed](#).
- P7 L12: suggest: "Small changes in wind speed are (thus) amplified when converted to power." [Done](#).
- P8 L18-20: suggest to split in 2 or 3 shorter sentences. Remove "the aim was", as the next sentence also states "the objective". [Done](#).
- P8 L20: remove "left" (or write "left untouched"?) [Done](#). [Agreed. This was a very complex sentence. It was been simplified by using parenthesis.](#)
- P8 L22: "or if there were regional differences" can be omitted as it is already implied by the use of "whether". [Done](#).
- P10 L4: better to split up and rephrase, instead of using "but" twice in the same sentence. [Done](#).
- P10 L6: this sentence can also be split in two shorter sentences.
- P11 L6: Unclear, long sentence. [Done](#).
- P15 L2: "regional" should be "region(s)"? [Done](#).
- P17 L20: "conclusions can be drawn". [Done](#).
- P18 L1: "scheme and run" both refer to a scheme/set-up/configuration, right? [Yes, the name "simulations" has been used instead.](#)
- P21 L21: "six" instead of 6 (in line with the surrounding text) [Done](#).
- P21 L34: rephrase "which would face". [The two sentences have been rewritten](#)

- P22 L8: unclear sentence; a.g.l. and AGL are the same. Which figures? Indeed. Very confusing sentence. It has been rewritten.
- P23 L18: weird use of commas around ". . . change source...". Done. Should have been "changing the source..."
- P24 L2: "wind climate". Done.
- P24 L6-7: "however... but ...". Done.
- P24 L10: "best optimal" . Missing verb. Fixed.
- P24 L17: "observational dataset". Added.
